# Supplementary material for: High-Performance FAU Zeolite Membranes Derived from Nano-Seeds for Gas Separation
Source: Preprints.org preprint supplement (doi:10.20944/preprints202310.1150.v1), 2023-10-19
Supplement: Supplementary file 3 [file supplementary]

**Supporting information**

**High-Performance FAU Zeolite Membranes Derived from Nano-Seeds for Gas Separation**

Qing Wang1,2,*, Huiyuan Chen1, Feiyang He1, Qiao Liu1, Nong Xu1, Long Fan1, Chuyan Wang3, Lingyun Zhang1, Rongfei Zhou2,*

1. School of Energy, Materials and Chemical Engineering, Hefei University, Hefei 230601, China

2. State Key Laboratory of Materials-Oriented Chemical Engineering, College of Chemical Engineering, Nanjing Tech University, Nanjing 210009, China

3. School of Biological Food and Environment, Hefei University, Hefei 230601, China

*Correspondence: qingwang@hfuu.edu.cn (Q.W.); rf-zhou@njtech.edu.cn (R.F.Z.)

Table S1 Comparison of the H2/C3H8 separation properties of FAU membranes (MA and MM) with other membranes from recent literature.

| Membrane type | Temperature [°C] | H2 permeance  [mol/(m2 s Pa)] | H2/C3H8  selectivity [-] | Ref. |
| --- | --- | --- | --- | --- |
|
| Silica | 500 | 1.00E-07 | 98 | [1] |
| 650 | 1.60E-07 | 111 |
| Silica | 500 | 1.57E-07 | 139 |
| 650 | 2.78E-07 | 201 |
| MFI | 25 | 7.26E-08 | 0.86 | [2] |
| 100 | 9.20E-08 | 0.86 |
| 200 | 1.82E-07 | 1.21 |
| 300 | 2.06E-07 | 1.54 |
| 400 | 2.28E-07 | 2.48 |
| 450 | 2.28E-07 | 3.33 |
| 500 | 2.29E-07 | 3.99 |
| 550 | 2.36E-07 | 5.17 |
| 600 | 2.56E-07 | 6.34 |
| 650 | 2.56E-07 | 6.88 |
| SSZ-13 | 25 | 7.10E-06 | 4 | [3] |
| 25 | 3.20E-06 | 4 |
| 25 | 6.60E-08 | 520 |
| 25 | 6.00E-08 | 590 |
| 25 | 8.40E-08 | 810 |
| 25 | 3.00E-08 | 220 |
| Silica | 200 | 1.53E-08 | 4.6 | [4] |
| 200 | 1.66E-08 | 3.7 |
| 400 | 3.13E-08 | 14 |
| 400 | 3.31E-08 | 11 |
| 500 | 1.39E-07 | 92 |
| 500 | 1.43E-07 | 67 |
| NaA | 25 | 1.70E-05 | 3.95 | [5] |
| 25 | 3.61E-06 | 11.34 |
| ANA Zeolite | 25 | 1.07E-06 | 138 | [6] |
| NaA | 50 | 4.81E-07 | 7.28 | [7] |
| 100 | 3.44E-07 | 5.72 |
| 250 | 1.62E-07 | 4.82 |
| 100 | 2.06E-07 | 4.62 |
| 200 | 2.46E-07 | 4.02 |
| 300 | 4.45E-07 | 4.38 |
| SAPO-34 | 25 | 4.20E-08 | 18 | [8] |
| 25 | 4.80E-08 | 21 |
| 25 | 8.60E-08 | 18 |
| 25 | 1.12E-07 | 16 |
| 25 | 1.23E-07 | 22 |
| 25 | 4.77E-08 | 5 |
| 100 | 5.73E-08 | 7 |
| 200 | 7.16E-08 | 10 |
| 300 | 9.36E-08 | 14 |
| 400 | 1.16E-07 | 14 |
| 450 | 1.37E-07 | 16 |
| 500 | 1.52E-07 | 19 |
| 550 | 1.87E-07 | 22 |
| 600 | 2.01E-07 | 23 |
| 650 | 2.30E-07 | 27 |
| NaY | Room temperature | 5.34E-07 | 183 | This work |

Table S2. Membrane separation performance data of C3H6/C3H8

| Material | Permeability/ Barrer | Selectivity | Membrane type | Reference |
| --- | --- | --- | --- | --- |
| 6FDA-TeMPD | 37 | 8.6 | Polymers | [9] |
| 6FDA-TrMPD | 30 | 11 | Polymers | [9] |
| 6FDA-DDBT | 0.76 | 27 | Polymers | [9] |
| 6FDA-ODA | 0.48 | 11 | Polymers | [9] |
| BPDA-TeMPD | 3.2 | 13 | Polymers | [9] |
| PPO | 2.9 | 9.1 | Polymers | [9] |
| P4MP | 54 | 2 | Polymers | [9] |
| 1.2PB | 260 | 1.7 | Polymers | [9] |
| PDMS | 6600 | 1.1 | Polymers | [9] |
| Matrimid® 5218 | 0.1 | 16 | Polymers | [10] |
| 6FDA-1,5-NDA | 0.24 | 5.8 | Polymers | [11] |
| 6FDA-BPDA/DDBT(1/1) | 1 | 31 | Polymers | [12] |
| PIM-PIs | 393 | 6 | Polymers | [13] |
| 6FDA-DAM | 15.7 | 12.4 | Polymers | [14] |
| sulfonylated PPO | 18.1 | 3.05 | Polymers | [15] |
| 6FDA-based PI | 0.89 | 16 | Polymers | [16] |
| PEO | 6.6 | 2.75 | Polymers | [17] |
| P84/Matrimid | 7 | 18.2 | Polymers | [17] |
| azide-PIM | 40 | 10 | Polymers | [18] |
| crosslinked PI | 4.5 | 11 | Polymers | [19] |
| Pebax 2533 | 580 | 1.6 | Polymers | [20] |
| Na-X-Ag | 420 | 50 | Zeolites | [21] |
| ETS-10 | 944 | 5.5 | Zeolites | [22] |
| Zeolite Y-Ag | 1016 | 4.8 | Zeolites | [23] |
| Na-X | 520 | 6.2 | Zeolites | [24] |
| Na-X | 428 | 13.7 | Zeolites | [25] |
| Na-X | 420 | 3.3 | Zeolites | [26] |
| NaY | 1090 | 46 | Zeolites | This Work |
| Phenolic resin carbon membrane | 90 | 17 | Carbon Membranes | [27] |
| Phenolic resin carbon membrane | 200 | 3.1 | Carbon Membranes | [28] |
| PI-based carbon membrane | 5.2 | 22 | Carbon Membranes | [29] |
| Phenolic resin carbon membrane | 19 | 5.4 | Carbon Membranes | [30] |
| Sulfonated PI-based carbon membranes | 15 | 4.2 | Carbon Membranes | [31] |
| Interpenetrating network-based carbon membrane | 48 | 44 | Carbon Membranes | [32] |
| PI-based carbon membrane | 14.4 | 36 | Carbon Membranes | [33] |
| Silicon membrane | 13.3 | 37 | Carbon Membranes | [34] |
| PI-based carbon membrane | 0.528 | 35 | Carbon Membranes | [35] |
| PIM-PI-based carbon membrane | 45 | 33 | Carbon Membranes | [36] |
| PI-based carbon membrane | 15.6 | 31 | Carbon Membranes | [37] |
| PIM-β-CD | 1500 | 5.8 | Carbon Membranes | [38] |
| PI-based carbon membrane | 240 | 30 | Carbon Membranes | [39] |
| PI-based carbon membrane | 403 | 25 | Carbon Membranes | [40] |
| 6FDA-DAM/ZIF-8 | 100 | 6.6 | Mixed Matrix Membranes | [41] |
| Ethy CA/C60 | 61.3 | 4.9 | Mixed Matrix Membranes | [42] |
| CA/SiO2 | 0.098 | 6.12 | Mixed Matrix Membranes | [43] |
| Fluorinated PI/TiO2 | 0.08 | 5.11 | Mixed Matrix Membranes | [44] |
| Matrimid/SiO2 | 0.16 | 18.03 | Mixed Matrix Membranes | [45] |
| Thermal crosslinked PI/ZIF-8 | 42.7 | 27.47 | Mixed Matrix Membranes | [46] |
| 6FDA-DAM+Y-fum- fcu-MOF | 33.4 | 18 | Mixed Matrix Membranes | [47] |
| PIM-6FDA-OH/ZIF-8 | 38 | 43 | Mixed Matrix Membranes | [48] |
| XLPEO/ZIF-8 | 28 | 15 | Mixed Matrix Membranes | [49] |
| PU/ZIF-8 | 140 | 3.5 | Mixed Matrix Membranes | [50] |
| SBS/Cu@MIL-101(Cr) | 353 | 1.9 | Mixed Matrix Membranes | [51] |
| Pebax 1657/ZIF-8 | 84 | 5.57 | Mixed Matrix Membranes | [52] |
| 6FDA-DAM/ZIF-8 | 56.2 | 31 | Mixed Matrix Membranes | [14] |
| 6FDA-DAM/ZIF-67 | 34.1 | 29.9 | Mixed Matrix Membranes | [53] |
| PIM-1/SIFSIX-3-Zn | 4012 | 7.9 | Mixed Matrix Membranes | [54] |


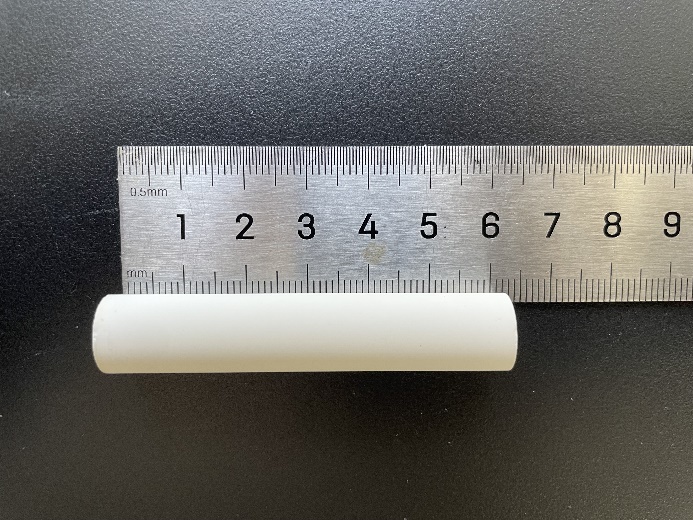


Figure S1. The optical photograph of an FAU (MA) membrane.

**References:**

[1] K. Ishii, A. Shibata, T. Takeuchi, J. Yoshiura, T. Urabe, Y. Kameda, M. Nomura, Development of silica membranes to improve dehydration reactions, Journal of the Japan Petroleum Institute 62(5) (2019) 211-219.

[2] S.-J. Kim, S. Tan, M. Taborga Claure, L. Briones Gil, K.L. More, Y. Liu, J.S. Moore, R.S. Dixit, J.G. Pendergast Jr, D.S. Sholl, One-step synthesis of zeolite membranes containing catalytic metal nanoclusters, ACS applied materials & interfaces 8(37) (2016) 24671-24681.

[3] S. Yang, Y.H. Kwon, D.Y. Koh, B. Min, Y. Liu, S. Nair, Highly Selective SSZ‐13 Zeolite Hollow Fiber Membranes by Ultraviolet Activation at Near‐Ambient Temperature, ChemNanoMat 5(1) (2019) 61-67.

[4] H. Weyten, K. Keizer, A. Kinoo, J. Luyten, R. Leysen, Dehydrogenation of propane using a packed‐bed catalytic membrane reactor, AIChE Journal 43(7) (1997) 1819-1827.

[5] X.-L. Wei, H. Liu, Y.-Y. Xu, Y.-L. Sun, Z.-S. Chao, Synthesis of NaA zeolite membrane by maintaining pressure difference between the two sides of the support, CrystEngComm 20(44) (2018) 7195-7205.

[6] B. Liu, C. Au, Preparation and separation performance of a TPAOH-induced ANA zeolite membrane, Chem. Lett. 31(8) (2002) 806-807.

[7] F. Morón, M. Pina, E. Urriolabeitia, M. Menéndez, J. Santamaria, Preparation and characterization of Pd-zeolite composite membranes for hydrogen separation, Desalination 147(1-3) (2002) 425-431.

[8] S.-J. Kim, Y. Liu, J.S. Moore, R.S. Dixit, J.G. Pendergast Jr, D. Sholl, C.W. Jones, S. Nair, Thin hydrogen-selective SAPO-34 zeolite membranes for enhanced conversion and selectivity in propane dehydrogenation membrane reactors, Chem. Mater. 28(12) (2016) 4397-4402.

[9] K. Tanaka, A. Taguchi, J. Hao, H. Kita, K. Okamoto, Permeation and separation properties of polyimide membranes to olefins and paraffins, Journal of membrane science 121(2) (1996) 197-207.

[10] J.J. Krol, M. Boerrigter, G.H. Koops, Polyimide hollow fiber gas separation membranes: preparation and the suppression of plasticization in propane/propylene environments, Journal of Membrane Science 184(2) (2001) 275-286.

[11] S.S. Chan, R. Wang, T.-S. Chung, Y. Liu, C2 and C3 hydrocarbon separations in poly (1, 5-naphthalene-2, 2′-bis (3, 4-phthalic) hexafluoropropane) diimide (6FDA-1, 5-NDA) dense membranes, Journal of membrane science 210(1) (2002) 55-64.

[12] M. Yoshino, S. Nakamura, H. Kita, K.-i. Okamoto, N. Tanihara, Y. Kusuki, Olefin/paraffin separation performance of asymmetric hollow fiber membrane of 6FDA/BPDA–DDBT copolyimide, Journal of membrane science 212(1-2) (2003) 13-27.

[13] R.J. Swaidan, B. Ghanem, R. Swaidan, E. Litwiller, I. Pinnau, Pure-and mixed-gas propylene/propane permeation properties of spiro-and triptycene-based microporous polyimides, Journal of Membrane Science 492 (2015) 116-122.

[14] C. Zhang, Y. Dai, J.R. Johnson, O. Karvan, W.J. Koros, High performance ZIF-8/6FDA-DAM mixed matrix membrane for propylene/propane separations, Journal of Membrane Science 389 (2012) 34-42.

[15] S.B. Gajbhiye, Membranes of benzene sulfonylated-polyphenylene oxide as affinity membranes for propylene and propane gases, (2015).

[16] C. Staudt-Bickel, W.J. Koros, Olefin/paraffin gas separations with 6FDA-based polyimide membranes, Journal of Membrane Science 170(2) (2000) 205-214.

[17] H. Lin, B.D. Freeman, Gas solubility, diffusivity and permeability in poly (ethylene oxide), Journal of Membrane Science 239(1) (2004) 105-117.

[18] N. Du, M.M.D. Cin, I. Pinnau, A. Nicalek, G.P. Robertson, M.D. Guiver, Azide‐based cross‐linking of polymers of intrinsic microporosity (PIMs) for condensable gas separation, Macromolecular rapid communications 32(8) (2011) 631-636.

[19] C. Staudt‐Bickel, Cross‐linked Copolyimide Membranes for the Separation of Gaseous and Liquid Mixtures, Soft Materials 1(3) (2003) 277-293.

[20] J.C. Chen, X. Feng, A. Penlidis, Gas permeation through poly (Ether‐b‐amide)(PEBAX 2533) block copolymer membranes, Separation science and technology 39(1) (2005) 149-164.

[21] M. Sakai, Y. Sasaki, T. Tomono, M. Seshimo, M. Matsukata, Olefin selective Ag-exchanged X-type zeolite membrane for propylene/propane and ethylene/ethane separation, ACS applied materials & interfaces 11(4) (2019) 4145-4151.

[22] I. Tiscornia, S. Irusta, C. Téllez, J. Coronas, J. Santamaría, Separation of propylene/propane mixtures by titanosilicate ETS-10 membranes prepared in one-step seeded hydrothermal synthesis, Journal of Membrane Science 311(1-2) (2008) 326-335.

[23] S. Shrestha, P.K. Dutta, Modification of a continuous zeolite membrane grown within porous polyethersulfone with Ag (I) cations for enhanced propylene/propane gas separation, Microporous and Mesoporous Materials 279 (2019) 178-185.

[24] V. Nikolakis, G. Xomeritakis, A. Abibi, M. Dickson, M. Tsapatsis, D.G. Vlachos, Growth of a faujasite-type zeolite membrane and its application in the separation of saturated/unsaturated hydrocarbon mixtures, Journal of Membrane Science 184(2) (2001) 209-219.

[25] I.G. Giannakopoulos, V. Nikolakis, Separation of propylene/propane mixtures using faujasite-type zeolite membranes, Industrial & engineering chemistry research 44(1) (2005) 226-230.

[26] A. Mundstock, N. Wang, S. Friebe, J. Caro, Propane/propene permeation through Na-X membranes: The interplay of separation performance and pre-synthetic support functionalization, Microporous and Mesoporous Materials 215 (2015) 20-28.

[27] I. Menendez, A.B. Fuertes, Aging of carbon membranes under different environments, Carbon 39(5) (2001) 733-740.

[28] A.B. Fuertes, I. Menendez, Separation of hydrocarbon gas mixtures using phenolic resin-based carbon membranes, Separation and purification technology 28(1) (2002) 29-41.

[29] M. Yoshino, S. Nakamura, H. Kita, K.-i. Okamoto, N. Tanihara, Y. Kusuki, Olefin/paraffin separation performance of carbonized membranes derived from an asymmetric hollow fiber membrane of 6FDA/BPDA–DDBT copolyimide, Journal of membrane science 215(1-2) (2003) 169-183.

[30] T.A. Centeno, J.L. Vilas, A.B. Fuertes, Effects of phenolic resin pyrolysis conditions on carbon membrane performance for gas separation, Journal of Membrane Science 228(1) (2004) 45-54.

[31] M.N. Islam, W. Zhou, T. Honda, K. Tanaka, H. Kita, K.-i. Okamoto, Preparation and gas separation performance of flexible pyrolytic membranes by low-temperature pyrolysis of sulfonated polyimides, Journal of membrane science 261(1-2) (2005) 17-26.

[32] M.L. Chng, Y. Xiao, T.-S. Chung, M. Toriida, S. Tamai, Enhanced propylene/propane separation by carbonaceous membrane derived from poly (aryl ether ketone)/2, 6-bis (4-azidobenzylidene)-4-methyl-cyclohexanone interpenetrating network, Carbon 47(7) (2009) 1857-1866.

[33] X. Ma, B.K. Lin, X. Wei, J. Kniep, Y.S. Lin, Gamma-alumina supported carbon molecular sieve membrane for propylene/propane separation, Industrial & Engineering Chemistry Research 52(11) (2013) 4297-4305.

[34] S.M. Ibrahim, R. Xu, H. Nagasawa, A. Naka, J. Ohshita, T. Yoshioka, M. Kanezashi, T. Tsuru, A closer look at the development and performance of organic–inorganic membranes using 2, 4, 6-tris [3 (triethoxysilyl)-1-propoxyl]-1, 3, 5-triazine (TTESPT), RSC Advances 4(24) (2014) 12404-12407.

[35] X. Ma, S. Williams, X. Wei, J. Kniep, Y.S. Lin, Propylene/propane mixture separation characteristics and stability of carbon molecular sieve membranes, Industrial & Engineering Chemistry Research 54(40) (2015) 9824-9831.

[36] R.J. Swaidan, X. Ma, I. Pinnau, Spirobisindane-based polyimide as efficient precursor of thermally-rearranged and carbon molecular sieve membranes for enhanced propylene/propane separation, Journal of Membrane Science 520 (2016) 983-989.

[37] X. Ma, Y.S. Lin, X. Wei, J. Kniep, Ultrathin carbon molecular sieve membrane for propylene/propane separation, AIChE Journal 62(2) (2016) 491-499.

[38] J. Liu, Y. Xiao, T.-S. Chung, Flexible thermally treated 3D PIM-CD molecular sieve membranes exceeding the upper bound line for propylene/propane separation, Journal of Materials Chemistry A 5(9) (2017) 4583-4595.

[39] S.-J. Kim, P.S. Lee, J.-S. Chang, S.-E. Nam, Y.-I. Park, Preparation of carbon molecular sieve membranes on low-cost alumina hollow fibers for use in C3H6/C3H8 separation, Separation and Purification Technology 194 (2018) 443-450.

[40] C. Karunaweera, I.H. Musselman, K.J. Balkus Jr, J.P. Ferraris, Fabrication and characterization of aging resistant carbon molecular sieve membranes for C3 separation using high molecular weight crosslinkable polyimide, 6FDA-DABA, Journal of Membrane Science 581 (2019) 430-438.

[41] C. Zhang, K. Zhang, L. Xu, Y. Labreche, B. Kraftschik, W.J. Koros, Highly scalable ZIF‐based mixed‐matrix hollow fiber membranes for advanced hydrocarbon separations, AIChE Journal 60(7) (2014) 2625-2635.

[42] H. Sun, C. Ma, T. Wang, Y. Xu, B. Yuan, P. Li, Y. Kong, Preparation and characterization of C60‐filled ethyl cellulose mixed‐matrix membranes for gas separation of propylene/propane, Chemical Engineering & Technology 37(4) (2014) 611-619.

[43] M. Naghsh, M. Sadeghi, A. Moheb, M.P. Chenar, M. Mohagheghian, Separation of ethylene/ethane and propylene/propane by cellulose acetate–silica nanocomposite membranes, Journal of membrane science 423 (2012) 97-106.

[44] H. Ahmadizadegan, F. Ghavvas, M. Ranjbar, S. Esmaielzadeh, Synthesis and characterization of fluorinated polyimide/TiO2 nanocomposites: enhancement of separation of four gases, thermal, optical and mechanical properties, Polymer Bulletin 75(7) (2018) 2729-2750.

[45] S.M. Davoodi, M. Sadeghi, M. Naghsh, A. Moheb, Olefin–paraffin separation performance of polyimide Matrimid®/silica nanocomposite membranes, RSC advances 6(28) (2016) 23746-23759.

[46] M. Askari, T.-S. Chung, Natural gas purification and olefin/paraffin separation using thermal cross-linkable co-polyimide/ZIF-8 mixed matrix membranes, Journal of membrane science 444 (2013) 173-183.

[47] Y. Liu, Z. Chen, G. Liu, Y. Belmabkhout, K. Adil, M. Eddaoudi, W. Koros, Conformation‐controlled molecular sieving effects for membrane‐based propylene/propane separation, Advanced Materials 31(14) (2019) 1807513.

[48] X. Ma, R.J. Swaidan, Y. Wang, C.-e. Hsiung, Y. Han, I. Pinnau, Highly compatible hydroxyl-functionalized microporous polyimide-ZIF-8 mixed matrix membranes for energy efficient propylene/propane separation, ACS Applied Nano Materials 1(7) (2018) 3541-3547.

[49] D. Liu, L. Xiang, H. Chang, K. Chen, C. Wang, Y. Pan, Y. Li, Z. Jiang, Rational matching between MOFs and polymers in mixed matrix membranes for propylene/propane separation, Chemical Engineering Science 204 (2019) 151-160.

[50] H.R. Amedi, M. Aghajani, Poly urethane mixed matrix membranes for propylene and propane separation, Chemical Papers 72 (2018) 1477-1485.

[51] J.P. Jung, M.J. Kim, Y.S. Bae, J.H. Kim, Facile preparation of C u (I) impregnated MIL‐101 (C r) and its use in a mixed matrix membrane for olefin/paraffin separation, Journal of Applied Polymer Science 135(31) (2018) 46545.

[52] H.R. Amedi, M. Aghajani, Economic estimation of various membranes and distillation for propylene and propane separation, Industrial & Engineering Chemistry Research 57(12) (2018) 4366-4376.

[53] H. An, S. Park, H.T. Kwon, H.-K. Jeong, J.S. Lee, A new superior competitor for exceptional propylene/propane separations: ZIF-67 containing mixed matrix membranes, Journal of Membrane Science 526 (2017) 367-376.

[54] Q. Shen, S. Cong, R. He, Z. Wang, Y. Jin, H. Li, X. Cao, J. Wang, B. Van der Bruggen, Y. Zhang, SIFSIX-3-Zn/PIM-1 mixed matrix membranes with enhanced permeability for propylene/propane separation, Journal of Membrane Science 588 (2019) 117201.
